# Supplementary material for: Epigenetic Alterations in the Brain Associated with HIV-1 Infection and Methamphetamine Dependence
Source: PubMed Central journal article supplement (PMC4108358; doi:10.1371/journal.pone.0102555), 2014-07-23

**Figure S2. Schematic depiction of Neurological Disease pathway highlighting differentially methylated genes in HIV+ METH abusers.**

Canonical pathway analysis was performed using Ingenuity Pathway Analysis. Genes with increased methylation are showed in red and those with decreased methylation appear in green. The association of differentially methylated genes with Neurological disease was reported with a score of 44 and p values ranging between 1.38E-04 and 1.99E-02 for all associated molecules.

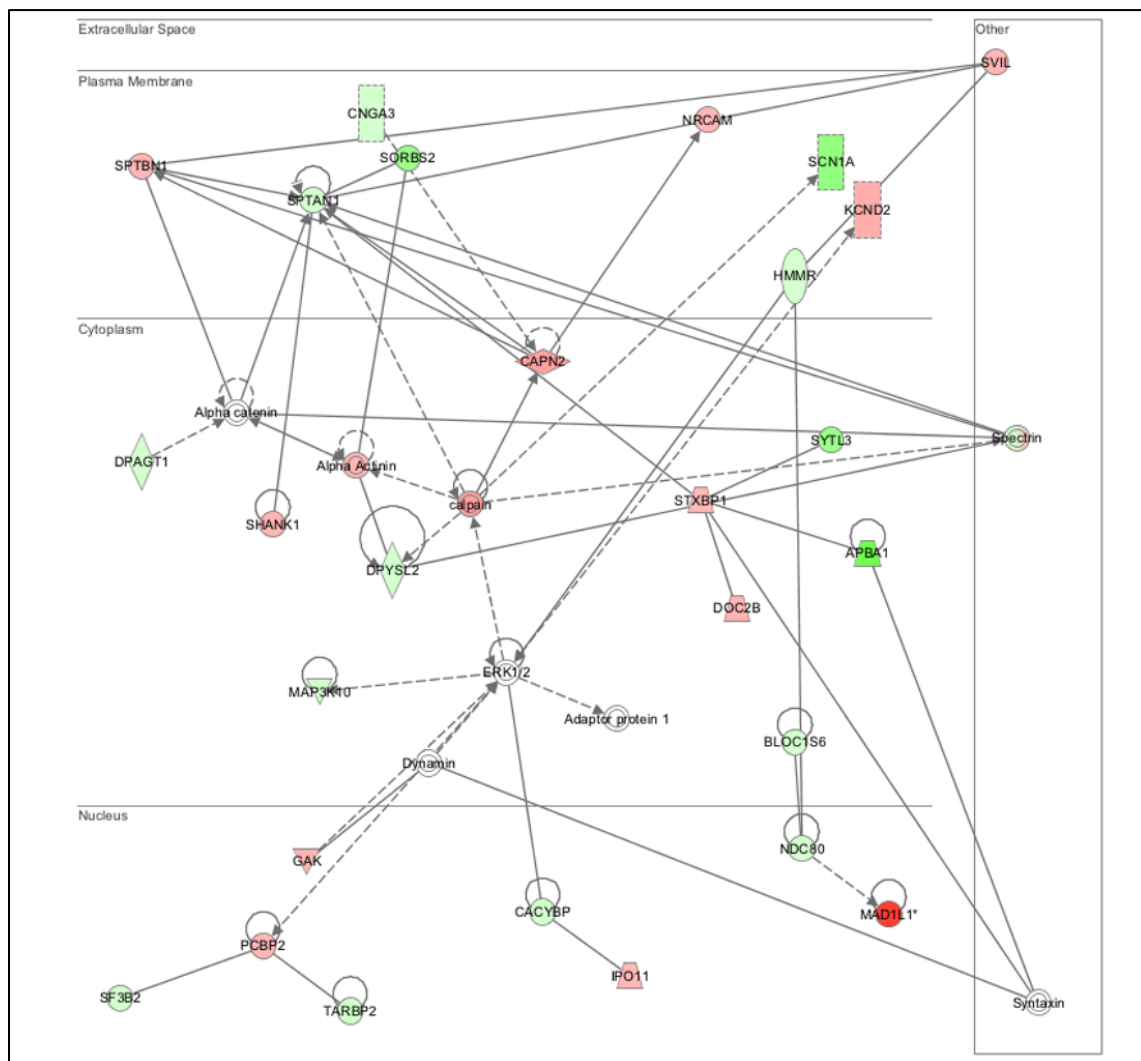

Supplement: pone.0102555.s002.pdf [file pone.0102555.s002.pdf]
